# Supplementary material
Source: PubMed Central journal article supplement (PMC1951761)

Supplemental data:

**Table S1. Primer sequences used in the RNAi vector construction and probes for**

**Northern blot analysis:** All sequences are described in the 5' to 3' directions. Underlined regions are the restriction sites for the enzyme XhoI in the sequence 8F and HindIII in the sequence 9R. In sequence names 'F' stands for forward primer and 'R' stands for reverse primer.

| Primers for RNAi vector construction                                                                               | Primers for probe preparation used in Northern blot analysis                            |
|--------------------------------------------------------------------------------------------------------------------|-----------------------------------------------------------------------------------------|
| <p>TbCen1:</p> <p>8F <u>GGCTCGAGT</u>GTGCGCTTAAGGGGACACCAC</p> <p>9R GGA<u>AAGCTT</u>GTCCAAGTCGAATAACTGGAACGCC</p> | <p>TbCen1:</p> <p>10F GGGGAAAATCTCGTTTGCAAACCTG</p> <p>11R AGCGACAGGTGAACGACACGGAAG</p> |
|                                                                                                                    | <p>TbCen2:</p> <p>18F GAAGTGCGCCGCTTGATCGC</p> <p>19R GGTACAAATATACATACACG</p>          |
|                                                                                                                    | <p>TbCen3:</p> <p>12F AAGAGGAGGTCTTGCGCATG</p> <p>13R GATGATAGCAGTAGAACTCGC</p>         |
|                                                                                                                    | <p>TbCen4:</p> <p>14F CTTGACAGGTTGGCGCGTCC</p> <p>15R TCACGCAGAAAGAGCGGCTGC</p>         |
|                                                                                                                    | <p>TbCen5:</p> <p>16F CTTCCCGAATTTGAGGCGATTG</p> <p>17R TGTTTGTGTGCTACCGGTGC</p>        |

**Table S2. Primer sequences for plasmid construction to ectopically express TbCen1 protein in the parasite:** All are described in 5' to 3' directions. Single underlined regions are the restriction sites for the enzyme HindIII in the sequence 28F and AflIII in the sequence 29R. Double underlined in sequence 28F denotes 26 nucleotides upstream of Luciferase orf from the vector pLew100 which was added upstream of the centrin genes. In sequence names 'F' stands for forward primer and 'R' stands for reverse primer.

|     |                                                                      |
|-----|----------------------------------------------------------------------|
| 28F | GGAAGCTTGGAAATTCCTTTGTGTTACATTCTT<br>GAATGGCGGCGCTTACTGATGAACAGATCCG |
| 29R | GGCTTAAGTTTGCCACGCATCTGCATCATGA<br>CGC                               |

**Table S3 The pair wise amino acid similarity for the centrin sequences. This was calculated using MacVector 7.2.2 program**

|        | TbCen1 | LdCen1 | LmCen1 | CrCen1 | MmCen4 | HsCen1 | MmCen1 | HsCen2 | MmCen2 | TbCen2 | LmCen2 | TbCen3 | LmCen3 | CDC31 | HsCen3 | MmCen3 | TbCen5 | LmCen5 | TbCen4 | LmCen4 |
|--------|--------|--------|--------|--------|--------|--------|--------|--------|--------|--------|--------|--------|--------|-------|--------|--------|--------|--------|--------|--------|
| TbCen1 | 100    |        |        |        |        |        |        |        |        |        |        |        |        |       |        |        |        |        |        |        |
| LdCen1 | 97     | 100    |        |        |        |        |        |        |        |        |        |        |        |       |        |        |        |        |        |        |
| LmCen1 | 97     | 100    | 100    |        |        |        |        |        |        |        |        |        |        |       |        |        |        |        |        |        |
| CrCen1 | 58     | 59     | 59     | 100    |        |        |        |        |        |        |        |        |        |       |        |        |        |        |        |        |
| MmCen4 | 57     | 59     | 59     | 83     | 100    |        |        |        |        |        |        |        |        |       |        |        |        |        |        |        |
| HsCen1 | 58     | 60     | 60     | 83     | 86     | 100    |        |        |        |        |        |        |        |       |        |        |        |        |        |        |
| MmCen1 | 57     | 59     | 59     | 82     | 83     | 93     | 100    |        |        |        |        |        |        |       |        |        |        |        |        |        |
| HsCen2 | 59     | 61     | 61     | 83     | 85     | 95     | 95     | 100    |        |        |        |        |        |       |        |        |        |        |        |        |
| MmCen2 | 58     | 59     | 59     | 83     | 85     | 95     | 95     | 98     | 100    |        |        |        |        |       |        |        |        |        |        |        |
| TbCen2 | 53     | 54     | 54     | 67     | 68     | 70     | 68     | 71     | 71     | 100    |        |        |        |       |        |        |        |        |        |        |
| LmCen2 | 57     | 56     | 56     | 68     | 66     | 68     | 69     | 71     | 71     | 73     | 100    |        |        |       |        |        |        |        |        |        |
| TbCen3 | 51     | 51     | 51     | 60     | 60     | 61     | 60     | 61     | 61     | 60     | 55     | 100    |        |       |        |        |        |        |        |        |
| LmCen3 | 50     | 50     | 50     | 61     | 60     | 62     | 61     | 62     | 63     | 61     | 58     | 89     | 100    |       |        |        |        |        |        |        |
| CDC31  | 51     | 52     | 52     | 58     | 60     | 62     | 61     | 62     | 63     | 55     | 54     | 59     | 61     | 100   |        |        |        |        |        |        |
| HsCen3 | 51     | 53     | 53     | 67     | 68     | 70     | 69     | 70     | 70     | 59     | 59     | 71     | 68     | 70    | 100    |        |        |        |        |        |
| MmCen3 | 51     | 53     | 53     | 67     | 68     | 69     | 69     | 70     | 70     | 58     | 59     | 71     | 67     | 69    | 99     | 100    |        |        |        |        |
| TbCen5 | 44     | 44     | 44     | 55     | 49     | 51     | 50     | 50     | 50     | 46     | 46     | 45     | 48     | 44    | 48     | 48     | 100    |        |        |        |
| LmCen5 | 35     | 34     | 34     | 44     | 46     | 47     | 45     | 45     | 46     | 41     | 41     | 41     | 42     | 39    | 40     | 39     | 60     | 100    |        |        |
| TbCen4 | 47     | 48     | 48     | 57     | 57     | 56     | 55     | 56     | 55     | 46     | 48     | 50     | 49     | 50    | 53     | 53     | 43     | 34     | 100    |        |
| LmCen4 | 46     | 46     | 46     | 58     | 55     | 56     | 55     | 57     | 57     | 48     | 48     | 48     | 49     | 51    | 54     | 53     | 41     | 35     | 78     | 100    |

## FIGURE LEGENDS

**Figure S1.** Western blots showing the expression of TbCen1. Lanes 1 and 2 show the expressed proteins using anti-HA antibody on the lysate from TbCen-HA transgenic cells. Lane 3 shows the specific cross-reactivity of anti-LdCen1 antibody on the lysate of parasite. In each well 20 µg of total extracted proteins were loaded.

**Figure S2.** Western blot showing the unaffected expression level of Fla1 protein using anti-Fla1 antibody in TbCen1 depleted cells. In each well 20 µg of total extracted proteins were loaded. Ponceau S staining shows equal amount of proteins were loaded on to gel.

# Supplemental data

Figure S1

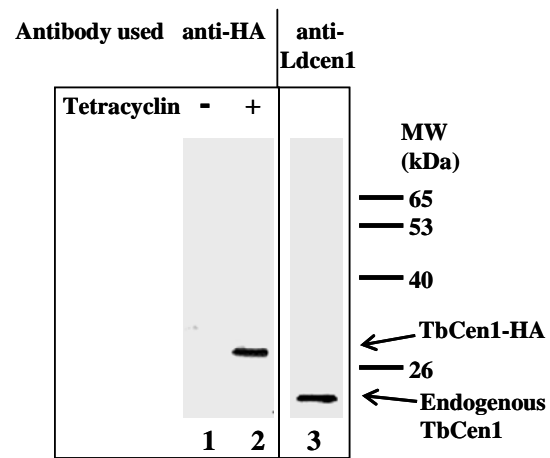

Figure S2

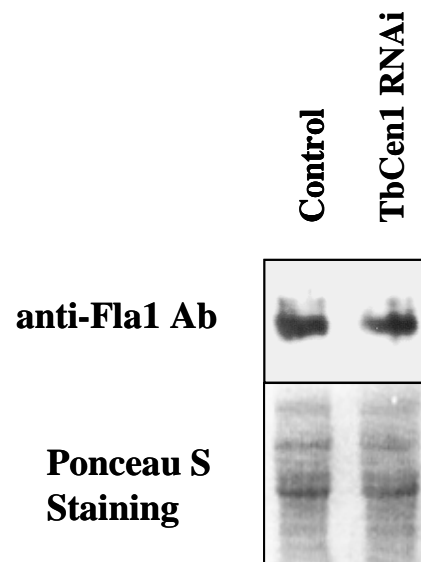

Supplement: mbc_E07-01-0022_1.pdf [file mbc_E07-01-0022_1.pdf]
